# Supplementary material for: Forensic parameters and admixture in Mestizos from five geographic regions of Mexico based on 20 autosomal STRs (Powerplex 21 system)
Source: Springer Nature journal article supplement (doi:10.1007/s00414-018-1810-z), 2018-03-01
Supplement: MOESM4 [file 15500204]

## Sheet: Northwest
Table S3_a. Allele frequencies and forensic parameters of Mexican-Mestizos from the Northwest region
Allele	D3S1358	D1S1656	D6S1043	D13S317	PENTA E	D16S539	D18S51	D2S1338	CSF1PO	PENTA D	TH01	VWA	D21S11	D7S820	D5S818	TPOX	D8S1179	D12S391	D19S433	FGA
2					0.00252525
2.2										0.00257732
5					0.0378788
6					0.00252525						0.2825					0.0052356
7					0.0707071				0.0125		0.3075			0.02	0.0527638	0.0026178
7.3																0.0026178
8				0.1225	0.040404	0.0025			0.005	0.0154639	0.085			0.1025	0.00251256	0.570681	0.0125
9	0.0025			0.175	0.00757576	0.1625			0.03	0.162371	0.1375			0.0725	0.0628141	0.0418848	0.0075
9.3											0.1875
10		0.00251256	0.0025	0.1175	0.0429293	0.185	0.0025		0.255	0.255155				0.2475	0.0552764	0.0471204	0.115		0.0025
11		0.0477387	0.225	0.2025	0.0782828	0.24	0.015		0.2725	0.170103				0.3	0.427136	0.256545	0.08		0.0025
11.2																			0.0025
12		0.0954774	0.165	0.2225	0.176768	0.2575	0.11		0.35	0.157216				0.2075	0.288945	0.0732984	0.09		0.0625
12.2																			0.0175
13	0.005	0.0954774	0.105	0.1075	0.0631313	0.13	0.1425		0.065	0.193299				0.0425	0.0929648		0.325		0.2325
13.2																			0.0875
14	0.0675	0.0929648	0.1425	0.05	0.106061	0.02	0.165		0.0075	0.0412371		0.0725		0.0075	0.0100503		0.235		0.2425
14.2							0.0025												0.04
14.3		0.00502513
15	0.3725	0.10804	0.0175	0.0025	0.121212	0.0025	0.1725		0.0025	0.00257732		0.11			0.00502513		0.1125	0.03	0.125
15.2		0.00251256																	0.11
15.3		0.0175879
16	0.2625	0.20603	0.0075		0.0808081		0.1125	0.03				0.2875	0.0025				0.0225	0.0175	0.025
16.2																			0.045
16.3		0.040201
17	0.1825	0.0452261	0.0425		0.0429293		0.155	0.1775				0.275	0.0025					0.0625	0.0025
17.3		0.168342																0.0175
18	0.1025	0.0201005	0.1125		0.0429293		0.0475	0.0775				0.16			0.00251256			0.18	0.0025	0.015
18.2		0.00251256
18.3		0.0351759																0.0075
19	0.0025	0.00251256	0.07		0.0277778		0.0175	0.24				0.0725						0.2075		0.08
19.3		0.0125628
20	0.0025		0.0225		0.0151515		0.0175	0.1375				0.0225						0.2		0.0925
20.3			0.0025
21			0.015		0.0227273		0.01	0.0375					0.0025					0.08		0.1275
21.2																				0.005
21.3			0.025
22			0.03		0.0176768		0.0125	0.0575										0.0925		0.13
22.2																				0.0025
22.3			0.01
23			0.0025				0.0075	0.1225										0.05		0.1675
23.2
24			0.0025				0.005	0.0675										0.015		0.15
25							0.005	0.05										0.015		0.1175
26																				0.075
26.2																				0.0025
27													0.02					0.0025		0.015
28								0.0025					0.0725							0.005
29													0.22							0.005
29.2													0.0025
30													0.285
30.2													0.02
31													0.0625							0.0025
31.2													0.1275
32													0.0075
32.2													0.1275
33.2													0.0425
34.2													0.0025
36													0.0025
36.2																				0.0025
PC	0.1044	0.0299235	0.03385	0.0517	0.0201	0.0735	0.0363	0.0391	0.1247	0.0738654	0.09965	0.07825	0.0567	0.0838	0.122749	0.205395	0.065	0.04035	0.0463	0.0305
PD	0.8956	0.970077	0.96615	0.9483	0.9799	0.9265	0.9637	0.9609	0.8753	0.926135	0.90035	0.92175	0.9433	0.9162	0.877251	0.794605	0.935	0.95965	0.9537	0.9695
PIC	0.703592	0.871771	0.855503	0.814713	0.904149	0.767275	0.856611	0.843191	0.686248	0.789326	0.725775	0.763559	0.805239	0.756423	0.674923	0.548849	0.771915	0.845872	0.825548	0.869437
PE	0.398004	0.743426	0.764891	0.62717	0.772782	0.608353	0.785217	0.714667	0.52703	0.716308	0.553495	0.646232	0.655851	0.580614	0.490622	0.262971	0.553495	0.724634	0.685034	0.846721
IPT	1.5625	3.98	4.34783	2.7027	4.5	2.5641	4.7619	3.57143	2.08333	3.59259	2.22222	2.85714	2.94118	2.38095	1.91346	1.17901	2.22222	3.7037	3.22581	6.66667
Het	0.68	0.874372	0.885	0.815	0.888889	0.805	0.895	0.86	0.76	0.860825	0.775	0.825	0.83	0.79	0.738693	0.575916	0.775	0.865	0.845	0.925
MAF	0.0135	0.0158	0.0159	0.0149	0.0161	0.0147	0.0161	0.0151	0.0152	0.159	0.0144	0.015	0.015	0.0146	0.0158	0.0132	0.015	0.015	0.015	0.015
HWE	0.0433	0.55553	0.99832	0.14522	0.03328	0.8052	0.02431	0.38572	0.66094	0.03283	0.60942	0.77821	0.15075	0.68612	0.78981	0.30952	0.81133	0.04947	0.22615	0.73802

## Sheet: Northeast
Table S3_b. Allele frequencies and forensic parameters of Mexican-Mestizos from the Northeast region
Allele	D3S1358	D1S1656	D6S1043	D13S317	PENTA E	D16S539	D18S51	D2S1338	CSF1PO	PENTA D	TH01	VWA	D21S11	D7S820	D5S818	TPOX	D8S1179	D12S391	D19S433	FGA
2.2										0.00295858
5					0.0290698						0.00284091
6											0.28125	0.00284091
7					0.0552326				0.00571429	0.00295858	0.372159			0.00568182	0.0747126
8				0.0568182	0.0290698	0.0113636				0.0147929	0.0852273			0.0710227	0.0114943	0.485207	0.00285714
9				0.232955	0.00290698	0.0965909			0.00857143	0.162722	0.0852273			0.0681818	0.0402299	0.0473373	0.00285714
9.3											0.159091
10			0.00284091	0.113636	0.0232558	0.161932	0.00284091		0.254286	0.248521	0.0113636			0.275568	0.0632184	0.0384615	0.0771429		0.00284091
11		0.0340909	0.113636	0.190341	0.0784884	0.28125	0.00852273		0.285714	0.174556	0.00284091			0.318182	0.482759	0.289941	0.0514286
11.2																			0.00284091
12		0.0681818	0.125	0.232955	0.168605	0.321023	0.116477		0.388571	0.133136				0.213068	0.232759	0.130178	0.0942857		0.0397727
12.2																			0.0142045
13	0.0113636	0.105114	0.130682	0.102273	0.0697674	0.107955	0.0994318		0.0514286	0.186391		0.00284091		0.0397727	0.091954	0.00887574	0.354286		0.161932
13.2																			0.0965909
14	0.0511364	0.119318	0.213068	0.0653409	0.0784884	0.0170455	0.190341		0.00571429	0.0680473		0.0767045		0.00852273	0.00287356		0.245714		0.326705
14.2																			0.0397727
14.3		0.0142045
15	0.46875	0.125	0.0397727	0.00284091	0.136628	0.00284091	0.144886			0.00591716		0.0767045					0.14	0.0142045	0.142045
15.2		0.00284091																	0.102273
15.3		0.03125
16	0.28125	0.190341	0.00568182		0.0930233		0.107955	0.0142045				0.366477					0.0285714	0.0255682	0.0454545
16.2		0.00284091																	0.0227273
16.3		0.03125
17	0.107955	0.0710227	0.0426136	0.00284091	0.0930233		0.170455	0.15625				0.247159						0.0625
17.3		0.116477	0															0.00852273
18	0.0681818	0.0170455	0.0795455		0.0290698		0.0994318	0.0454545				0.161932						0.184659
18.3		0.0625																0.0142045
19	0.0113636	0.00284091	0.0710227		0.0203488		0.0340909	0.255682				0.0653409					0.00285714	0.244318		0.08
19.3		0.00568182																0.0113636
20			0.0255682		0.0174419		0.00852273	0.125										0.201705		0.0685714
20.3			0.0113636
21			0.0113636		0.0261628		0.00568182	0.0198864										0.09375		0.102857
21.3			0.0539773
22			0.0539773		0.0261628		0.00284091	0.0909091										0.0511364		0.128571
22.2																		0	0.00284091
22.3			0.0113636
23			0.00852273		0.0174419		0.00568182	0.173295										0.0568182		0.128571
23.2																				0.00571429
24					0.00581395		0.00284091	0.0681818										0.0198864		0.165714
25								0.0454545										0.0113636		0.157143
26								0.00284091												0.105714
27								0.00284091					0.0227273							0.04
28													0.0880682							0.0114286
29													0.196023							0.00285714
30													0.258523
30.2													0.0113636
31													0.0823864
31.2													0.122159
32													0.0113636
32.2													0.127841
33.2													0.0738636
34.2													0.00284091
35													0.00284091
PC	0.143982	0.0264075	0.0262784	0.05953	0.0196728	0.0934272	0.0373838	0.0428719	0.149322	0.0592066	0.110989	0.0938791	0.0454545	0.0943311	0.135421	0.163055	0.0796408	0.0471978	0.0546875	0.0308571
PD	0.856018	0.973592	0.973722	0.94047	0.980327	0.906573	0.962616	0.957128	0.850678	0.940793	0.889011	0.906121	0.954545	0.905669	0.864579	0.836945	0.920359	0.952802	0.945312	0.969143
PIC	0.63557	0.882503	0.877372	0.801002	0.903142	0.735193	0.852846	0.829572	0.643545	0.799904	0.702249	0.728391	0.824506	0.729436	0.656081	0.606789	0.74599	0.827732	0.801793	0.867995
PE	0.38405	0.790779	0.74469	0.622442	0.727191	0.611755	0.7792	0.699349	0.415125	0.664205	0.529408	0.519537	0.644054	0.539377	0.370428	0.398705	0.578004	0.677028	0.699349	0.766339
IPT	1.51724	4.88889	4	2.66667	3.73913	2.58824	4.63158	3.38462	1.62037	3.01786	2.09524	2.04651	2.83871	2.14634	1.47458	1.56481	2.36486	3.14286	3.38462	4.375
Het	0.670455	0.897727	0.875	0.8125	0.866279	0.806818	0.892045	0.852273	0.691429	0.83432	0.761364	0.755682	0.823864	0.767045	0.66092	0.680473	0.788571	0.840909	0.852273	0.885714
MAF	0.0151	0.0151	0.0151	0.0151	0.018	0.0151	0.0151	0.0151	0.0154	0.0177	0.0151	0.0151	0.0151	0.0151	0.0152	0.0177	0.0154	0.0151	0.0151	0.0154
HWE	0.44578	0.23105	0.51193	0.20267	0.11679	0.71804	0.32574	0.89093	0.41966	0.55379	0.37674	0.48453	0.92431	0.14191	0.31387	0.18184	0.97569	0.06645	0.39784	0.74697

## Sheet: West
			Table S3_c. Allele frequencies and forensic parameters of Mexican-Mestizos from the West region
Allele	D3S1358	D1S1656	D6S1043	D13S317	PENTA E	D16S539	D18S51	D2S1338	CSF1PO	PENTA D	TH01	VWA	D21S11	D7S820	D5S818	TPOX	D8S1179	D12S391	D19S433	FGA
2.2										0.0083612
5					0.0284281					0.00167224
6											0.273333	0.00166667				0.00333333
6.3														0.00166667
7					0.0769231				0.00166667	0.0117057	0.336667			0.0133333	0.06
8				0.0733333	0.0367893	0.0166667			0.015	0.00668896	0.0866667			0.0866667	0.00333333	0.511667	0.00333333
9			0.00166667	0.245	0.00668896	0.0616667			0.0283333	0.173913	0.0916667			0.0566667	0.0566667	0.06	0.00333333
9.3											0.2	0.00166667
10		0.00166667	0.01	0.0866667	0.0434783	0.2	0.00833333		0.246667	0.217391	0.0116667			0.295	0.0566667	0.0516667	0.1		0.005
10.3														0.00166667
11		0.02	0.145	0.218333	0.0602007	0.265	0.00833333	0.00166667	0.276667	0.145485		0.00166667		0.3	0.418333	0.273333	0.055		0.005
11.2
12		0.07	0.155	0.211667	0.185619	0.313333	0.136667	0.00166667	0.363333	0.185619				0.183333	0.301667	0.1	0.116667		0.05
12.2																			0.0166667
13	0.01	0.0783333	0.131667	0.115	0.0819398	0.126667	0.106667		0.0583333	0.16388		0.00333333		0.0583333	0.1		0.325		0.203333
13.2		0.00166667																	0.095
14	0.0566667	0.101667	0.158333	0.05	0.090301	0.0133333	0.148333		0.00666667	0.0752508		0.065		0.00333333	0.00333333		0.278333		0.285
14.2																			0.055
14.3		0.015
15	0.403333	0.151667	0.0333333		0.12709	0.00166667	0.135		0.00333333	0.0100334		0.0866667					0.0966667	0.02	0.13
15.2	0.00333333																		0.0783333
15.3		0.0466667
16	0.305	0.198333	0.00833333		0.0668896		0.138333	0.0216667				0.331667					0.02	0.0266667	0.045
16.2																			0.025
16.3		0.0583333
17	0.126667	0.0516667	0.04		0.0618729	0.00166667	0.155	0.133333				0.278333	0.00166667				0.00166667	0.0633333	0.00333333
17.2																			0.00166667
17.3		0.145																0.0116667
18	0.085	0.0116667	0.095		0.0284281		0.0683333	0.09				0.158333	0.00166667					0.168333	0.00166667	0.0166667
18.3		0.0366667						0.00166667										0.00666667
19	0.00833333	0.00333333	0.0816667		0.0317726		0.0466667	0.198333				0.06						0.235		0.0833333
19.3		0.00833333
20	0.00166667		0.0283333		0.0351171		0.0133333	0.16				0.01						0.235		0.101667
20.3			0.015
21			0.00666667		0.0250836		0.00833333	0.035				0.00166667	0.00166667					0.101667		0.103333
21.3			0.0466667
22			0.0283333		0.0100334		0.01	0.0516667										0.0533333		0.138333
22.2																				0.00333333
22.3			0.00833333
23			0.00333333		0.00334448		0.00833333	0.17										0.04		0.135
23.2			0.00166667																	0.005
24			0.00166667				0.00333333	0.0733333										0.0183333		0.15
24.2													0.00833333					0.00166667
25							0.00333333	0.0516667					0.00166667					0.0183333		0.135
26								0.00666667					0.00166667							0.095
27							0.00166667						0.0116667							0.0216667
28													0.0816667							0.01
29													0.188333							0.00166667
29.2													0.00166667
30								0.00166667					0.315
30.2													0.0216667
31													0.0683333
31.2								0.00166667					0.0983333
32													0.005
32.2													0.143333
33.2													0.0316667
34													0.00333333
34.2													0.0116667
36													0.00166667
PC	0.122911	0.0266667	0.0232889	0.0587333	0.0175501	0.0931778	0.0286	0.0339333	0.124133	0.0527846	0.1064	0.0873556	0.0537111	0.0843111	0.120711	0.168644	0.0826889	0.0464667	0.0460111	0.0282222
PD	0.877089	0.973333	0.976711	0.941267	0.98245	0.906822	0.9714	0.966067	0.875867	0.947215	0.8936	0.912644	0.946289	0.915689	0.879289	0.831356	0.917311	0.953533	0.953989	0.971778
PIC	0.67334	0.874269	0.879774	0.794237	0.902495	0.735423	0.866782	0.853809	0.678096	0.811982	0.716463	0.738834	0.801845	0.741321	0.671166	0.596984	0.74986	0.822038	0.818964	0.872486
PE	0.449187	0.688305	0.761515	0.655851	0.842763	0.544599	0.714667	0.701445	0.476181	0.693876	0.568482	0.532853	0.649432	0.48169	0.383394	0.275185	0.586726	0.668762	0.701445	0.768271
IPT	1.74419	3.26087	4.28571	2.94118	6.5	2.17391	3.57143	3.40909	1.85185	3.32222	2.30769	2.11268	2.88462	1.875	1.51515	1.20968	2.41935	3.06122	3.40909	4.41176
Het	0.713333	0.846667	0.883333	0.83	0.923077	0.77	0.86	0.853333	0.73	0.849498	0.783333	0.763333	0.826667	0.733333	0.67	0.586667	0.793333	0.836667	0.853333	0.886667
MAF	0.00833333	0.00833333	0.00833333	0.00833333	0.00833333	0.00833333	0.00833333	0.00833333	0.00833333	0.00833333	0.00833333	0.00833333	0.00833333	0.00833333	0.00833333	0.00833333	0.00833333	0.00833333	0.00833333	0.00833333
HWE	0.99323	0.06675	0.03761	0.29045	0.53961	0.15469	0.31324	0.85646	0.00164	0.34047	0.84425	0.22217	0.54989	0.41956	0.01092	0.99367	0.63275	0.09293	0.0806	0.08495

## Sheet: Center
Table S3_d. Allele frequencies and forensic parameters of Mexican-Mestizos from the Center region
Allele	D3S1358	D1S1656	D6S1043	D13S317	PENTA E	D16S539	D18S51	D2S1338	CSF1PO	PENTA D	TH01	VWA	D21S11	D7S820	D5S818	TPOX	D8S1179	D12S391	D19S433	FGA
2.2										0.0108225
4											0.00214592
5					0.0217391					0.00649351
6										0.0021645	0.330472					0.00239234
7					0.0391304				0.00215517		0.330472			0.00438596	0.0688889
8				0.0579399	0.0195652				0.00215517	0.004329	0.0407725			0.0855263	0.00666667	0.533493	0.00429185
9				0.218884	0.00652174	0.083691			0.012931	0.168831	0.0643777			0.0526316	0.0533333	0.0526316	0.00429185
9.3										0.0021645	0.227468
10			0.00436681	0.133047	0.0347826	0.201717			0.290948	0.244589	0.00429185			0.223684	0.0311111	0.0287081	0.083691		0.00214592
11		0.0107296	0.0982533	0.188841	0.0565217	0.274678	0.0107296		0.241379	0.162338		0.00214592		0.346491	0.493333	0.258373	0.0321888		0.00214592
11.2																			0.00214592
12	0.00214592	0.0536481	0.111354	0.203863	0.176087	0.313305	0.100858	0.00215517	0.385776	0.136364				0.234649	0.26	0.114833	0.135193		0.0407725
12.2																			0.0214592
13	0.00858369	0.139485	0.122271	0.130901	0.0717391	0.111588	0.109442		0.0581897	0.192641				0.0460526	0.0733333	0.00956938	0.371245	0.00214592	0.182403
13.2																			0.109442
14	0.0407725	0.113734	0.248908	0.0643777	0.073913	0.0128755	0.188841		0.00431034	0.0627706		0.0579399		0.00657895	0.0111111		0.227468	0.00214592	0.291845
14.2																			0.0536481
14.3		0.00214592
15	0.493562	0.145923	0.0393013	0.00214592	0.147826	0.00214592	0.165236		0.00215517	0.00649351		0.0751073			0.00222222		0.120172	0.0236052	0.130901
15.2																			0.0922747
15.3		0.0257511
16	0.246781	0.188841	0.00218341		0.110866		0.0815451	0.0172414				0.351931					0.0150215	0.0150215	0.0407725
16.2																			0.0236052
16.3		0.0472103
17	0.130901	0.0472103	0.0349345		0.0673913		0.184549	0.116379				0.311159					0.00429185	0.0536481
17.2																			0.00643777
17.3		0.150215	0.00218341				0											0.0128755
18	0.0708155	0.0236052	0.0873362		0.05		0.0944206	0.0301724				0.150215					0.00214592	0.175966		0.0131004
18.3		0.0364807																0.0128755
19	0.00643777	0.00643777	0.0938865		0.0434783		0.0300429	0.221983				0.0450644						0.27897		0.0633188
19.3		0.00858369																0.00429185
20			0.0196507		0.0369565		0.00643777	0.148707				0.00643777						0.261803		0.0524017
20.2																				0.00218341
20.3			0.00655022
21			0.0152838		0.023913		0.0128755	0.0237069										0.055794		0.115721
21.2																				0.00436681
21.3			0.0305677
22			0.0545852		0.0173913		0.00858369	0.0948276										0.0386266		0.10917
22.3			0.0131004																	0.010917
23			0.010917		0.00217391		0.00214592	0.247845										0.0343348		0.10262
23.3			0.00218341																	0.00218341
24							0.00429185	0.0517241										0.0171674		0.18559
24.2																				0.00218341
25								0.0280172										0.00858369		0.165939
25.2													0.00214592
26								0.012931					0.00214592							0.120087
27								0.00215517					0.00429185					0.00214592		0.0349345
28								0.00215517					0.0665236							0.0131004
29													0.182403
29.2													0.0107296
30													0.276824							0.00218341
30.2													0.0257511
31													0.0858369
31.2													0.130901
32													0.00643777
32.2													0.145923
33.2													0.0472103
33.3													0.00214592
34.2													0.00858369
35													0.00214592
PC	0.152978	0.0298956	0.0294617	0.0512995	0.0197353	0.0956179	0.0356794	0.0463734	0.148818	0.0572141	0.122658	0.107186	0.0473208	0.0902585	0.143704	0.183627	0.0872921	0.0615042	0.0491997	0.0297286
PD	0.847022	0.970104	0.970538	0.9487	0.980265	0.904382	0.964321	0.953627	0.851182	0.942786	0.877342	0.892814	0.952679	0.909741	0.856296	0.816373	0.912708	0.938496	0.9508	0.970271
PIC	0.627066	0.865877	0.86624	0.810408	0.899679	0.728543	0.848978	0.820354	0.650181	0.801798	0.674383	0.70628	0.817861	0.726227	0.633095	0.581787	0.738476	0.789071	0.818855	0.867321
PE	0.364434	0.6776	0.689278	0.619912	0.777692	0.603828	0.652624	0.667869	0.480737	0.584659	0.447777	0.427596	0.611847	0.417488	0.404609	0.312062	0.564475	0.497004	0.6776	0.689278
IPT	1.45625	3.14865	3.27143	2.64773	4.6	2.53261	2.9125	3.05263	1.87097	2.40625	1.73881	1.66429	2.58889	1.62857	1.58451	1.30625	2.28431	1.94167	3.14865	3.27143
Het	0.656652	0.841202	0.847162	0.811159	0.891304	0.802575	0.828326	0.836207	0.732759	0.792208	0.712446	0.699571	0.806867	0.692982	0.684444	0.617225	0.781116	0.742489	0.841202	0.847162
MAF	0.0107296	0.0107296	0.010917	0.0107296	0.0108696	0.0107296	0.0107296	0.0107759	0.0107759	0.0108225	0.0107296	0.0107296	0.0107296	0.0109649	0.0111111	0.0119617	0.0107296	0.0107296	0.0107296	0.010917
HWE	0.54082	0.0819	0.46853	0.36506	0.07346	0.76862	0.33293	0.49879	0.54039	0.00914	0.99873	0.03084	0.23698	0.19734	0.71753	0.1113	0.51678	0	0.15955	0.01627

## Sheet: Southeast
Table S3_e. Allele frequencies and forensic parameters of Mexican-Mestizos from the Southeast region
Allele	D3S1358	D1S1656	D6S1043	D13S317	PENTA E	D16S539	D18S51	D2S1338	CSF1PO	PENTA D	TH01	VWA	D21S11	D7S820	D5S818	TPOX	D8S1179	D12S391	D19S433	FGA
2.2										0.00632911
5					0.0233051					0.0021097
6						0.00404858		0.00200803			0.35743					0.0042735
7					0.0466102			0.00200803	0.00408163	0.0021097	0.295181			0.00609756	0.0425101
8				0.0564516	0.0233051	0.00809717			0.00408163	0.0147679	0.0682731	0.00201613		0.0691057	0.00404858	0.472222	0.00604839
9				0.252016	0.00211864	0.109312	0.00403226		0.0183673	0.179325	0.0923695			0.0386179	0.048583	0.0598291	0.00604839
9.3											0.166667
10		0.00202429	0.00612245	0.129032	0.0487288	0.220648	0.00604839		0.214286	0.238397	0.0140562			0.223577	0.0465587	0.0384615	0.0927419
10.3														0.00406504
11		0.0202429	0.136735	0.169355	0.0572034	0.246964	0.0100806	0.00200803	0.281633	0.154008		0.00201613		0.321138	0.489879	0.241453	0.0362903		0.0060241
11.2																			0.00200803
12	0.00201613	0.0546559	0.14898	0.219758	0.207627	0.311741	0.106855	0.00200803	0.397959	0.160338	0.00200803	0.00201613		0.260163	0.275304	0.17735	0.125		0.0502008
12.2																			0.0200803
12.3			0.00204082
13	0.0100806	0.143725	0.140816	0.110887	0.0868644	0.0809717	0.122984		0.0693878	0.175105	0.00200803	0.00201613		0.0630081	0.0850202	0.00641026	0.288306		0.174699
13.2																			0.158635
13.3		0.00202429
14	0.0524194	0.109312	0.214286	0.0604839	0.0889831	0.0161943	0.211694		0.00612245	0.0506329	0.00200803	0.0423387	0.00201613	0.0101626	0.00607287		0.258065		0.25502
14.2																			0.062249
14.3		0.0161943
15	0.447581	0.137652	0.0204082	0.00201613	0.127119	0.00202429	0.129032			0.0126582		0.0987903	0.00201613				0.159274	0.0221774	0.134538
15.2															0.00202429		0		0.0823293
15.3		0.0222672
16	0.290323	0.157895	0.00816327		0.0762712		0.0826613	0.0261044		0.00421941		0.356855					0.0221774	0.0483871	0.0281124
16.2																			0.0160643
16.3		0.0526316
16.4					0.00847458
17	0.122984	0.0445344	0.044898		0.059322		0.177419	0.118474	0.00204082			0.268145		0.00203252			0.00604839	0.0685484	0.00401606
17.2																			0.00401606
17.3		0.149798																0.0120968	0.00200803
17.4					0.00211864
18	0.0645161	0.0283401	0.0877551		0.0317797		0.078629	0.0562249	0.00204082			0.163306						0.173387		0.00816327
18.3		0.0526316																0.0120968
19	0.0100806	0.00607287	0.0571429		0.0423729		0.0221774	0.24498				0.0483871		0.00203252				0.25		0.0877551
19.3																		0.006
20			0.0183673		0.0317797		0.0201613	0.146586				0.0120968						0.221774		0.0571429
20.3			0.00816327
21			0.00816327		0.0233051		0.0100806	0.0361446				0.00201613						0.0625		0.0938776
21.3			0.0326531
22			0.0510204		0.00635593		0.0120968	0.062249										0.0604839		0.116327
22.2																				0.00408163
22.3			0.0102041																	0.00204082
23			0.00204082		0.00423729			0.208835										0.0383065		0.136735
23.2																				0.00204082
24			0.00204082				0.00403226	0.0662651										0.0141129		0.15102
25					0.00211864		0	0.0180723					0.00201613					0.00806452		0.144898
25.2																				0.00204082
26							0.00201613	0.0060241					0.00201613					0.00201613		0.14898
27								0.00200803					0.0120968							0.0367347
28													0.0866935							0.00816327
29													0.247984
29.2													0.00604839
30													0.258065
30.2													0.0120968
31													0.0524194
31.2													0.106855
32													0.00604839
32.2													0.145161
33.2													0.046371
34.2													0.0100806
35.2													0.00201613
PC	0.154331	0.0271271	0.0315702	0.0605164	0.0194269	0.0878723	0.0368757	0.0412413	0.144856	0.0523242	0.110434	0.0983676	0.050826	0.0905876	0.15242	0.149974	0.0693613	0.0516064	0.0443541	0.0291379
PD	0.845669	0.972873	0.96843	0.939484	0.980573	0.912128	0.963124	0.958759	0.855144	0.947676	0.889566	0.901632	0.949174	0.909412	0.84758	0.850026	0.930639	0.948394	0.955646	0.970862
PIC	0.646469	0.878211	0.863553	0.800284	0.895336	0.739062	0.851992	0.829867	0.661239	0.804732	0.70314	0.724637	0.805278	0.733098	0.625507	0.635227	0.770583	0.823149	0.829099	0.868335
PE	0.41835	0.760013	0.700907	0.696454	0.774695	0.564945	0.793773	0.627665	0.450705	0.555947	0.511485	0.509766	0.581204	0.527313	0.346664	0.397247	0.59605	0.672738	0.681847	0.766339
IPT	1.63158	4.25862	3.40278	3.35135	4.53846	2.28704	4.96	2.70652	1.75	2.23585	2.00806	2	2.38462	2.08475	1.40341	1.56	2.48	3.1	3.19231	4.375
Het	0.693548	0.882591	0.853061	0.850806	0.889831	0.781377	0.899194	0.815261	0.714286	0.776371	0.751004	0.75	0.790323	0.760163	0.643725	0.679487	0.798387	0.83871	0.843373	0.885714
MAF	0.0100806	0.0101215	0.0102041	0.0100806	0.0105932	0.0101215	0.0100806	0.0100402	0.0102041	0.0105485	0.0100402	0.0100806	0.0100806	0.0101626	0.0101215	0.0106838	0.0100806	0.0100806	0.0100402	0.0102041
HWE	0.06118	0.07043	0.33629	0.27682	0.29622	0.96878	0.05684	0.17327	0.00262	0.16546	0.03613	0.01121	0.17786	0.38439	0.24418	0.46935	0.84128	0.00272	0.58119	0.47211

## Sheet: combined Mexican-Mestizos
Table S3_f. Allele frequencies and forensic parameters of the combined Mexican-Mestizo population sample
Allele	D3S1358	D1S1656	D6S1043	D13S317	PENTA E	D16S539	D18S51	D2S1338	CSF1PO	PENTA D	TH01	VWA	D21S11	D7S820	D5S818	TPOX	D8S1179	D12S391	D19S433	FGA
2					0.000515464
2.2										0.00726895
4				0.000503525							0.000503018
5					0.0283505					0.00259605	0.000503018
6					0.00103093						0.293763	0.00100806				0.00375134
7					0.0536082				0.00708502	0.00155763	0.339537			0.0101112	0.0599593	0.000535906
7.3																0.000535906
8				0.0715005	0.0304124	0.00604839			0.00759109	0.0119418	0.0714286			0.082912	0.00660569	0.521972	0.00603015
9			0.000505051	0.223565	0.00618557	0.110887	0.00100604		0.0172065	0.167705	0.100604			0.0606673	0.0513211	0.0562701	0.00854271
9.3											0.183602	0.0015121
10		0.00100908	0.0040404	0.122356	0.0381443	0.19002	0.00452716		0.264676	0.245587	0.00754527			0.23913	0.0487805	0.0466238	0.0964824		0.00100503
10.3														0.00101112
11		0.0262361	0.146465	0.188822	0.0659794	0.265121	0.0100604		0.262146	0.157321	0.000503018	0.000504032		0.331143	0.479167	0.247053	0.0522613		0.00301508
11.2																			0.00201005
12	0.00150754	0.0691221	0.140909	0.222558	0.186598	0.297883	0.107143	0.000503525	0.37247	0.146417	0.00100604			0.215369	0.257114	0.117363	0.113065		0.0492462
12.2																			0.018593
13	0.00904523	0.110999	0.118687	0.113293	0.0757732	0.108871	0.125252		0.0617409	0.188993		0.00201613		0.0500506	0.0853659	0.00589496	0.332663	0.000503018	0.19598
13.2																			0.11005
14	0.0522613	0.107467	0.206061	0.0538771	0.0860825	0.0181452	0.183099		0.00506073	0.056594	0.00100604	0.0609879		0.00707786	0.00965447		0.239698	0.000503018	0.271357	0.00101112
14.2							0.000503018												0.0527638
14.3		0.0105954
15	0.441206	0.127649	0.0313131	0.00302115	0.130412	0.00201613	0.145875		0.00101215	0.0124611		0.0912298			0.00152439		0.127136	0.02666	0.132663
15.2																			0.0914573
15.3		0.0272452
16	0.271859	0.191726	0.00707071		0.0938144		0.0970825	0.0231621		0.00155763		0.331653	0.00100705				0.0201005	0.0301811	0.0371859
16.2																			0.0276382
16.3		0.0484359
16.4					0.00257732
17	0.140201	0.0519677	0.0393939	0.000503525	0.0608247		0.176056	0.139476				0.275202	0.00151057				0.00301508	0.0608652	0.00251256
17.2																			0.00201005
17.3		0.145812																0.0120724
17.4					0.0365979
18	0.0753769	0.0201816	0.0909091		0.000515464	0.000504032	0.0749497	0.0589124				0.16381	0.000503525		0.00050813		0.000502513	0.170523	0.00150754	0.0116279
18.3		0.0489405																0.0115694
19	0.00753769	0.00454087	0.0742424		0.028866		0.028672	0.238671	0.00101215			0.061996		0.000505561			0.000502513	0.242455		0.0788675
19.3		0.00807265																0.00855131
20	0.000502513		0.0237374		0.0237113		0.0140845	0.13998				0.0100806						0.227364		0.0768453
20.2
20.3			0.00555556															0.000503018
21			0.0131313		0.0242268	0.000504032	0.0120724	0.029708					0.000503525					0.0754527		0.11274
21.2																				0.00202224
21.3			0.0292929
22			0.0479798		0.0170103		0.0105634	0.072004										0.0578471		0.122346
22.2																			0.000502513	0.00505561
22.3			0.00858586
23			0.00959596		0.00670103		0.00452716	0.181269										0.0437626		0.128918
23.2																				0.00404449
23.3			0.000505051
24			0.00151515		0.00154639		0.00301811	0.0689829										0.0176056	0.000502513	0.163296
24.2													0.000503525
24.3			0.000505051															0.000503018
25					0.000515464		0.00100604	0.0357503					0.000503525					0.0115694		0.14459
25.2													0.000503525
26							0.000503018	0.00906344					0.00100705					0.00100604		0.104651
26.2																				0.000505561
27								0.00151057					0.0135952					0.000503018		0.0313448
28								0.00100705					0.0790534	0.000505561						0.00859454
29													0.202417	0.000505561						0.00151668
29.2													0.00503525
30													0.277442	0.000505561						0.000505561
30.2													0.0181269
31													0.072004							0.00101112
31.2													0.118832	0.000505561
32													0.00704935
32.2													0.137966
33.2													0.0528701
34													0.000503525
34.2													0.00654582
35													0.00100705
35.2													0.000503525
36													0.00100705
36.2																				0.000505561
PC	0.130901	0.0240612	0.025375	0.0539334	0.0155245	0.0828483	0.0318389	0.0363014	0.13718	0.0544228	0.103403	0.0892991	0.04681	0.085423	0.138746	0.165219	0.0720204	0.0446461	0.0433848	0.0268361
PD	0.869099	0.975939	0.974625	0.946067	0.984476	0.917152	0.968161	0.963699	0.86282	0.945577	0.896597	0.910701	0.95319	0.914577	0.861254	0.834781	0.92798	0.955354	0.956615	0.973164
PIC	0.658922	0.877496	0.870638	0.806408	0.90173	0.746513	0.856839	0.83904	0.668241	0.802633	0.708641	0.737855	0.814792	0.739802	0.648238	0.601143	0.762491	0.825864	0.824678	0.872319
PE	0.389739	0.748502	0.723928	0.669134	0.759776	0.58305	0.755343	0.678951	0.485839	0.617671	0.505472	0.5431	0.630426	0.522391	0.400835	0.340047	0.595315	0.634602	0.691401	0.776664
IPT	1.53549	4.06148	3.69403	3.06481	4.25439	2.39614	4.17647	3.16242	1.89272	2.63115	1.98008	2.16594	2.72802	2.06042	1.57188	1.38427	2.47512	2.76111	3.2947	4.5787
Het	0.674372	0.876892	0.864646	0.836858	0.882474	0.791331	0.880282	0.841893	0.73583	0.809969	0.747485	0.769153	0.816717	0.757331	0.681911	0.6388	0.79799	0.818913	0.848241	0.890799
MAF	0.0024975	0.0024975	0.0024975	0.0024975	0.0024975	0.0024975	0.0024975	0.0024975	0.0024975	0.0024975	0.0024975	0.0024975	0.0024975	0.0024975	0.0024975	0.0024975	0.0024975	0.0024975	0.0024975	0.0024975
HWE	0.99384	0.0796	0.04175	0.2833	0.54815	0.16124	0.28572	0.85781	0.00229	0.3296	0.84577	0.19857	0.56003	0.41935	0.01178	0.9951	0.64661	0.09903	0.09169	0.07908
